# Supplementary material for: A set of novel SNP loci for differentiating continental populations and three Chinese populations
Source: PeerJ. 2019 Mar 29;7:e6508. doi: 10.7717/peerj.6508 (PMC6445247; doi:10.7717/peerj.6508)
Supplement: Table S2 — Note: (A) Population specific In values in four continental populations were calculated based on the genetic data of 25 training populations. (B) Population specific In values in Han, Mongolian and Uygur populations were calculated based on the genetic data of these three populations. [file peerj-07-6508-s002.xlsx]

## Sheet: 1
Supplementary Table 2: The P-values of Hardy-Weinberg equilibrium tests of 48 SNP loci in 25 training population by Genepop software v4.0.
Loci	Biaka Pygmy	Mbuti Pygmy	Bantua	Yoruba	Mandenka	Brazianb	Maya	Pima	Basque	French	Italianc	Orcadian	Adygei	Russian	Cambodian	Dai	Han	Miao	Mongolian	She	Tu	Tujia	Yi	Japanese	Yakut
rs10148212	0.6198	1	1	0.5781	0.4303	1	0.155	1	1	-	1	1	1	1	1	0.2455	0.5357	1	0.0464	1	1	1	0.5732	0.7092	0.6309
rs1032332	1	1	0.1762	1	0.2137	0.5683	0.0621	0.6209	1	1	0.5915	-	0.5373	0.5579	0.5635	1	0.3451	1	1	1	0.5635	1	0.4799	0.2747	0.6868
rs10779958	1	0.3004	1	1	0.6232	0.0385	0.6618	0.6209	1	0.1131	1	0.4605	0.5729	1	1	1	0.2141	0.3065	1	1	1	0.1579	1	1	1
rs10852189	0.6326	1	0.6427	0.6596	0.6616	0.107	0.5781	0.513	0.1938	0.6714	1	0.5778	0.5729	1	0.5732	1	0.3549	0.5635	1	0.4799	0.4799	0.5199	0.5199	0.703	0.6626
rs10918196	1	-	1	0.338	0.2694	0.0028	1	0.5053	0.4027	0.2716	0.5499	0.5778	1	0.5864	1	1	1	0.3065	0.4799	1	1	1	0.4799	1	0.4153
rs10965206	0.6232	0.4991	0.3556	0.0668	0.6504	0.0018	0.6421	0.2384	1	1	0.5781	1	1	0.1211	1	0.5732	1	0.5732	1	0.4799	1	0.2198	0.5732	0.7167	0.552
rs11152349	0.5381	0.2751	0.2532	1	0.6232	1	0.3771	0.6167	1	0.0161	0.7443	1	0.1081	1	0.3065	-	1	1	1	0.5732	0.2198	0.4799	0.1731	1	0.2445
rs11218323	1	0.3739	1	0.6326	0.6198	1	1	1	1	1	0.6656	1	0.1789	1	1	1	1	0.5635	1	0.4799	0.5199	0.1731	1	0.4388	0.2327
rs1161474	0.4303	0.0758	0.6478	0.6242	0.5683	0.3606	0.3937	1	0.391	0.0188	0.7668	1	0.2762	1	0.5199	0.4799	1	1	1	0.4799	1	0.2455	0.5199	0.7092	0.6626
rs11716005	-	-	-	-	1	1	1	-	1	0.5488	0.1809	1	1	0.5418	0.5635	1	0.7565	1	1	1	0.5635	0.5732	0.2455	0.0636	1
rs1205357	1	1	1	0.2345	1	-	-	-	1	1	1	1	1	0.4843	1	0.2198	0.6567	1	1	1	0.4799	1	0.3065	1	-
rs12650562	1	0.1652	0.3562	1	0.0385	0.6504	1	1	1	0.4413	0.5666	1	0.6442	1	0.5199	0.2455	0.5395	0.5199	1	1	0.5199	1	0.2455	0.703	0.6399
rs1470253	1	1	1	0.6645	1	0.5381	1	0.2178	1	0.0155	0.387	1	0.1081	0.6253	0.0464	-	1	1	1	1	-	1	1	0.3465	1
rs162315	0.5381	1	0.0123	1	1	0.6527	0.6596	1	0.1509	1	0.5558	1	1	0.4843	0.4799	1	1	1	1	0.5732	0.4799	0.2198	1	1	1
rs16917217	0.6504	0.0261	0.2633	1	1	1	1	0.3198	1	0.6458	1	1	1	0.2999	0.5732	1	0.6612	0.5732	1	1	1	1	0.5635	0.2604	0.6626
rs170359	1	0.2092	0.6069	0.5327	1	0.5683	1	1	1	1	-	-	-	0.1211	1	1	1	1	1	-	1	-	-	0.4399	1
rs17650122	0.0385	1	0.1637	0.6421	0.3644	0.5381	0.6645	0.5899	1	1	0.7647	0.326	1	1	0.4799	1	0.4648	1	0.4799	1	1	1	0.4799	1	1
rs1857859	1	-	0.0116	1	0.5683	0.4133	1	0.5899	1	0.0927	0.0438	0.4605	0.6244	1	1	1	1	0.1331	0.4799	1	1	0.0817	0.0817	0.6714	0.6768
rs2178832	1	0.523	1	0.5781	0.4303	1	0.5398	0.5704	0.6826	1	0.0438	0.226	0.6244	0.6993	0.4799	1	0.5093	1	0.1998	0.2198	1	0.4799	1	0.3489	1
rs2373177	0.27	0.2092	1	0.4035	0.4186	0.6504	1	1	0.3983	0.196	0.744	1	0.6085	1	1	1	1	1	1	1	1	1	0.5635	0.2961	0.5418
rs2400219	1	1	1	0.338	0.5381	1	1	1	0.3455	0.6714	1	1	0.2884	1	1	1	1	0.0217	1	1	1	1	0.4799	1	1
rs2595599	1	1	1	0.3771	0.6504	0.009	0.1838	0.6167	1	1	1	1	1	1	1	0.1331	1	1	-	1	1	1	0.3065	0.5488	1
rs277329	0.0017	-	1	0.0929	0.4303	1	0.5398	0.3481	0.1938	0.3465	0.0887	1	0.2884	0.1211	0.5732	1	0.4155	0.5732	1	1	0.4799	1	1	0.4687	1
rs2801178	1	1	1	0.0276	0.5381	1	0.3423	0.5548	1	1	1	0.5778	1	1	1	0.0093	0.7468	1	1	1	1	1	1	0.4476	1
rs301927	1	1	0.3556	0.5398	0.2712	-	1	1	1	1	1	1	1	0.0832	0.4799	0.5199	1	0.5199	1	1	0.4799	1	1	0.2265	0.3707
rs351554	1	1	1	0.3277	1	0.3112	1	1	0.6211	1	1	1	0.5201	1	1	0.5732	0.1401	0.1731	1	1	0.1998	1	0.0817	1	1
rs35414	-	-	-	-	-	-	0.5327	1	1	0.4249	1	1	1	0.4095	0.3065	1	0.5683	1	-	0.3065	1	1	1	1	1
rs361557	1	1	-	1	1	1	1	1	0.5509	0.4399	0.3196	1	1	0.0514	0.1331	0.1998	0.3779	0.4799	1	1	1	0.5635	0.2455	0.7092	0.2445
rs3762894	1	0.0855	0.0328	0.2919	1	-	-	-	1	0.1757	0.5781	1	0.2406	1	1	1	1	1	1	0.4799	1	1	0.1731	0.3897	1
rs3782972	1	1	1	1	-	0.1378	1	0.6209	1	1	1	1	0.6244	0.2861	1	0.2455	0.2453	1	0.5635	0.5732	1	1	1	0.3489	1
rs4533619	1	0.5776	0.5252	1	0.5381	0.6616	1	1	1	1	0.5915	0.528	0.5254	0.0832	1	0.2198	1	1	1	1	1	1	1	0.5332	1
rs4646437	1	1	1	0.4483	0.2712	1	0.2345	0.5053	1	0.1767	1	0.3257	1	1	1	1	1	0.4799	1	1	-	1	-	1	1
rs4652825	1	1	0.3537	0.5781	0.6174	1	0.0918	0.3198	1	1	1	1	1	1	1	1	0.7239	0.4799	1	1	1	1	1	0.4476	1
rs4704322	-	-	1	-	1	0.6684	1	0.5548	1	0.1221	0.1235	0.528	1	0.4843	0.1331	1	1	-	1	1	-	1	0.4799	1	1
rs4711760	1	0.5079	1	1	1	0.5381	1	1	1	0.6955	1	0.226	0.5914	0.2327	-	-	1	-	1	-	-	-	1	1	1
rs4738110	1	-	-	1	1	1	0.0477	0.6167	0.0545	1	0.4142	1	1	0.6399	0.4799	0.4799	1	1	1	1	1	1	0.4799	0.632	0.434
rs4743923	-	-	-	1	1	1	1	1	0.4315	1	0.1879	1	0.324	0.6911	1	0.4799	0.4935	1	1	1	1	1	0.2198	0.7149	0.4217
rs4894436	0.2694	0.1652	1	0.5781	0.6232	-	1	1	0.3906	0.2265	1	0.4605	0.1774	0.6868	0.3065	-	1	1	1	-	1	-	1	1	0.4843
rs4933165	0.3112	0.2348	0.2587	1	1	1	0.0762	0.258	1	1	0.3316	1	0.2884	1	-	1	1	1	1	1	0.4799	0.3065	1	1	1
rs528438	1	1	1	0.6108	1	0.6174	0.5327	1	0.6357	1	0.5499	0.1234	0.2406	1	0.1579	1	1	-	1	0.4799	1	1	1	1	1
rs6446081	1	-	1	0.0276	1	1	1	1	0.3567	1	0.4704	1	0.5254	0.5579	0.4799	0.0455	0.1194	0.1731	1	1	1	1	0.4799	1	0.2762
rs7219900	0.3235	0.2348	0.6427	0.5781	0.6232	0.3235	1	0.3481	0.298	0.5332	1	1	1	1	1	0.5732	0.2366	0.4799	1	1	0.5732	1	0.5732	0.4389	0.552
rs7325443	0.3376	1	0.5252	1	1	1	1	0.3156	0.3983	1	0.2209	1	1	1	1	0.3065	0.1744	0.2198	1	1	1	0.1579	0.3065	1	0.6626
rs7570426	1	0.602	0.3537	0.6242	1	1	1	-	1	1	1	-	1	1	1	1	0.7406	0.2455	0.4799	1	0.5732	1	1	1	1
rs7795646	1	0.602	0.6069	0.38	1	0.2712	1	1	1	0.2534	0.5915	0.4605	0.1789	0.6309	1	1	0.3545	0.1998	1	1	0.5199	0.4799	1	1	0.115
rs871722	0.5381	-	1	1	0.1378	1	1	0.3481	1	0.2574	0.1777	1	0.5201	1	1	-	1	-	1	-	1	-	-	0.5332	0.4843
rs947612	1	1	1	-	1	1	0.6242	1	1	1	1	0.1034	1	1	1	-	0.4154	1	0.4799	0.1579	0.4799	1	1	1	1
rs9806693	0.5381	1	0.3788	0.3277	1	1	1	0.5704	1	0.1757	0.3018	1	1	1	1	1	0.1346	1	0.4799	1	1	0.4799	0.4799	1	1
Note. a, Bantu population includes Kenya Bantu and South African Bantu population. b, Brazian population includes Karitiana and Surui population. c, Italian population includes Sardinian, Tuscan and Bergamo population. '-' means that P-value of Hardy-Weinberg equilibrium of the locus can't be estimated in training population by Genepop software v4.0 because only one allele is presented, or two al…
