# Supplementary material for: A set of novel SNP loci for differentiating continental populations and three Chinese populations
Source: PeerJ. 2019 Mar 29;7:e6508. doi: 10.7717/peerj.6508 (PMC6445247; doi:10.7717/peerj.6508)
Supplement: Table S3 — Note. Three continental populations consists of 22 training populations (excluding from American populations) in Table 1. Values are the number of individuals who are classified as continental populations. Numbers in parentheses are the percentages of testing individuals who are classified as continental populations. [file peerj-07-6508-s003.xlsx]

## Sheet: 1
Supplementary Table 3. Population specific In values of 48 SNPs in four continental population and three Chinese population.
Loci	Africana	Americana	Europeana	East Asiana	Uygurb	Hanb	Mongolianb
rs10148212	0.0760702	0.00274926	0.141897	0.0121623	0.0337656	0.0632728	0.0523727
rs1032332	0.0317129	0.0103462	0.0799202	0.0282601	0.159042	0.0205991	0.0191698
rs10779958	0.00795212	0.000354615	0.164233	0.106661	0.0784549	0.048563	0.00393065
rs10852189	0.00732188	0.0265149	0.0106411	0.0114046	0.0867866	0.10523	0.0596202
rs10918196	0.0990865	0.00676749	0.0142481	0.0827655	0.21711	0.0999005	0.00103068
rs10965206	0.0243163	0.00333671	0.0672526	0.00822037	0.053657	0.0953056	0.0829867
rs11152349	0.0198076	0.00428026	0.0272608	0.0781281	0.0165812	0.000403669	0.0122881
rs11218323	0.000275715	0.00928966	0.0436132	0.044084	0.0424194	0.00529489	0.102883
rs1161474	0.0318645	0.00315063	0.0257273	5.35654e-05	0.0796899	0.0990144	0.0553574
rs11716005	0.0720689	0.0421772	0.00270416	0.0690832	0.0450938	0.00417267	0.0987856
rs1205357	0.297042	0.109572	0.0499864	0.00801811	0.00498424	0.000813581	0.000732719
rs12650562	0.0027547	0.0269939	0.00231517	0.000130223	0.0628307	0.109913	0.0940415
rs1470253	0.0770912	0.0507164	0.0864803	0.147855	0.0249715	0.00639233	0.00173602
rs162315	0.112464	0.00322164	0.0127553	0.010172	0.00278166	0.00414445	0.00278166
rs16917217	0.0162118	0.0250918	0.00764437	0.0555792	0.0878923	0.117265	0.0641344
rs170359	0.163687	0.00825811	0.0844576	0.0153903	0.00154811	0.0213142	0.034302
rs17650122	0.00100036	0.00902288	0.0110186	0.0273359	0.00211182	0.0336236	0.116173
rs1857859	0.0426689	0.0370985	0.00334048	0.00902826	0.00015438	0.0518196	0.125796
rs2178832	0.0220628	0.0095841	0.041822	0.0220525	0.0890616	0.106909	0.0458653
rs2373177	0.00632025	0.00491014	0.000918201	0.00366081	0.0505087	0.078759	0.0505087
rs2400219	0.0618777	0.0273728	0.0517767	0.197745	0.21711	0.068203	0.00417345
rs2595599	0.0032294	0.00434542	0.117779	0.0635247	0.190192	0.01978	0.0745972
rs277329	0.0301197	0.019528	0.0305421	0.104961	0.0541366	0.0832479	0.0541366
rs2801178	0.0562676	0.099108	0.0291965	0.0267031	0.0943139	0.0967727	0.0439278
rs301927	0.040314	0.110169	0.229937	0.0253956	0.0387522	0.0195845	0.000697589
rs351554	0.0885966	0.00711529	0.117371	0.00425341	0.015743	2.35123e-05	0.0169058
rs35414	0.129198	0.0122778	0.152125	0.027915	0.0141669	0.000548797	0.0615554
rs361557	0.157278	0.0305476	0.14469	0.00105397	0.0121726	0.00335427	0.000248437
rs3762894	0.00351082	0.154013	0.0365122	0.112075	0.0724741	0.11108	0.0724741
rs3782972	0.134535	0.0676598	0.0356175	0.0793494	0.00594018	0.0222097	0.0262538
rs4533619	0.012933	0.00466744	0.0870933	0.138595	0.189672	0.0336236	0.0198433
rs4646437	0.282895	0.000871419	0.0443368	0.0406705	0.00108244	0.00559305	0.0194252
rs4652825	0.00187908	0.0306262	0.0207275	0.00603099	0.0180066	0.01284	0.092047
rs4704322	0.182313	0.000817993	0.0652693	0.24226	0.239791	0.0917804	0.00612728
rs4711760	0.0126425	0.000184607	0.153409	0.111353	0.188808	0.0810585	0.00268129
rs4738110	0.157111	0.0346127	0.027244	0.0914247	0.03086	0.073669	0.0677017
rs4743923	0.108273	6.15253e-05	0.00733266	0.0100081	0.0451229	0.011046	0.134456
rs4894436	0.0630274	0.0849253	0.0836354	0.137097	0.297355	0.123456	0.00485238
rs4933165	0.0623647	0.00208326	0.116556	0.19601	0.119834	0.108256	0.0311686
rs528438	0.0777989	0.0403653	0.0534237	0.107391	0.0413893	0.0212681	0.000535002
rs6446081	0.0356265	0.00788139	0.00234811	0.0383371	0.0795689	0.0953658	0.0535765
rs7219900	0.140176	0.0120769	0.0737057	0.000274445	0.0301833	0.0726529	0.0794343
rs7325443	0.0449214	0.0385344	0.0692433	0.0852569	0.0570827	0.0896974	0.0570827
rs7570426	0.0139449	0.0422166	0.0733174	0.0513388	0.0648383	0.0806463	0.0439852
rs7795646	0.0141615	0.0693952	0.066909	0.00149109	0.0535765	0.00435591	0.118857
rs871722	0.329443	0.00155879	0.0316724	0.066656	0.00737261	0.00468698	0.000417538
rs947612	0.0609229	0.00588831	0.149575	0.0327133	0.087477	0.034219	1.82757e-05
rs9806693	0.0141082	0.000486118	0.0846839	0.0327945	0.172635	0.0555439	0.000473674
Cumulative In values	3.43125	1.30283	3.03427	2.77272	3.5791	2.49727	2.11215
Note: a, Population specific In values in four continental population were calculated based on the genetic data of 25 training population. b, Population specific In values in Han, Mongolian and Uygur population were calculated based on the genetic data of these three population.
