# Supplementary material for: A set of novel SNP loci for differentiating continental populations and three Chinese populations
Source: PeerJ. 2019 Mar 29;7:e6508. doi: 10.7717/peerj.6508 (PMC6445247; doi:10.7717/peerj.6508)
Supplement: Table S4 [file peerj-07-6508-s004.xlsx]

## Sheet: 1
Supplementary Table 4: Naïve Bayes analysis of six testing population and three continental population (African, European and East Asian).
Testing individuals	African	European	East Asian
Individuals originated from ESN	99 (100%)	0	0
Individuals originated from YRI	108 (100%)	0	0
Individuals originated from FIN	0	99 (100%)	0
Individuals originated from GBR	0	91 (100%)	0
Individuals originated from CHB	0	0	103 (100%)
Individuals originated from JPT	0	0	104 (100%)
Note. Three continental population consists of 22 training population (excluding from American population) in Table 1. Values are the number of individuals who are classified as continental population. Numbers in parentheses are the percentages of testing individuals who are classified as continental population.
